# Supplementary material
Source: PubMed Central journal article supplement (PMC7084095)
Supplement: pnas.1916786117.sapp.pdf [file pnas.1916786117.sapp.pdf]

# PNAS

[www.pnas.org](http://www.pnas.org)

Supplementary Information for

*Integrated structural and evolutionary analysis reveals common mechanisms underlying adaptive evolution in mammals*

Greg Slodkowitz and Nick Goldman

Email: [gslodko@mrc-lmb.cam.ac.uk](mailto:gslodko@mrc-lmb.cam.ac.uk) or [goldman@ebi.ac.uk](mailto:goldman@ebi.ac.uk)

**This PDF file includes:**

Figures S1 to S13  
Table S1

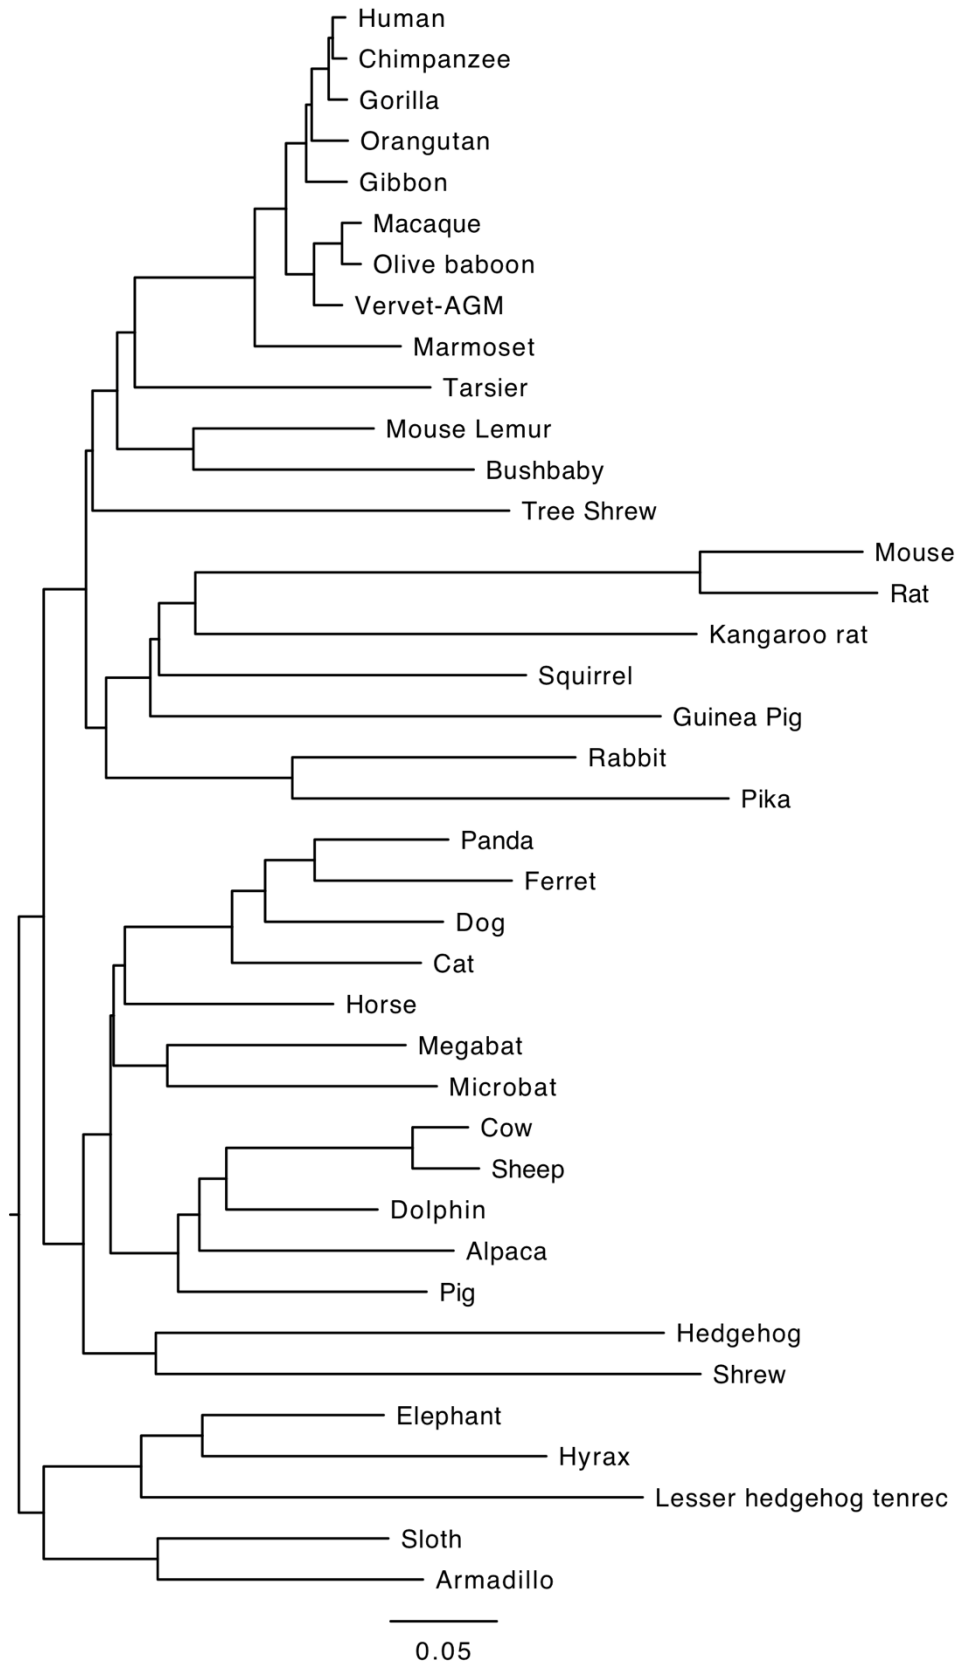

**Fig. S1.** Phylogenetic tree of species included in the analysis.

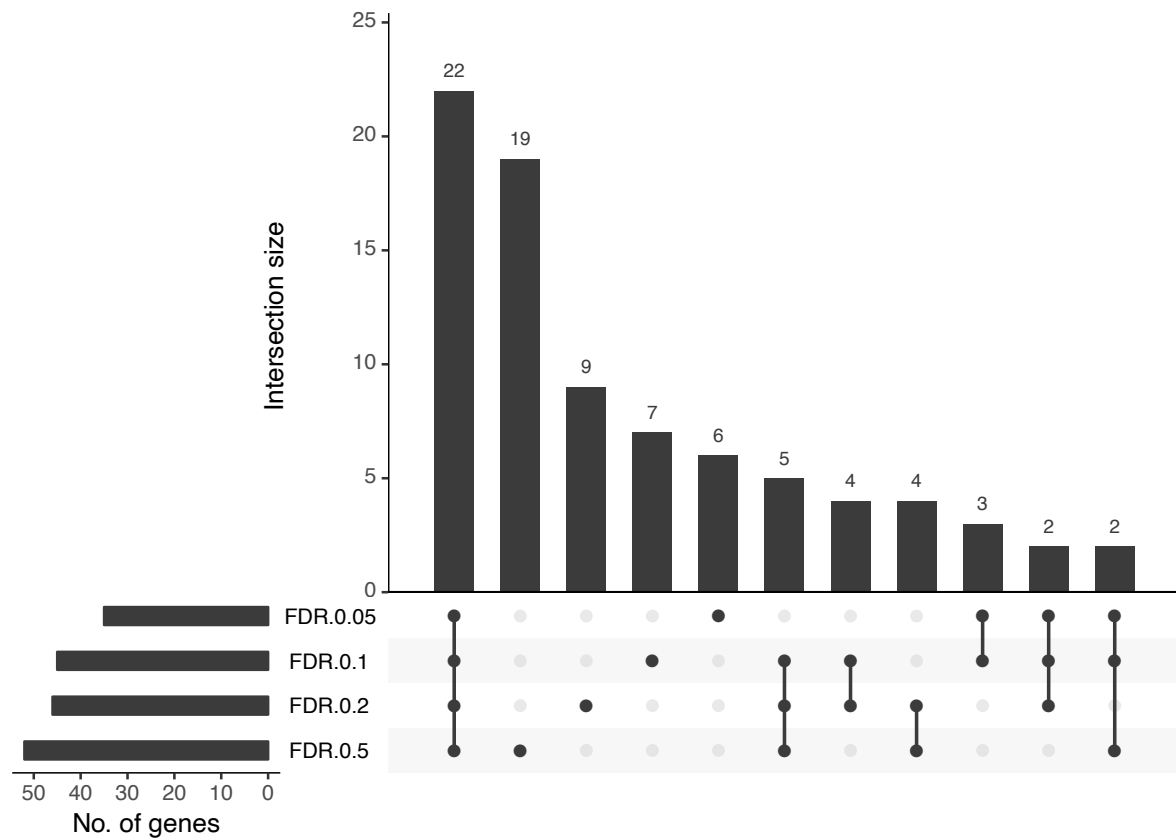

**Fig. S2.** Overlap between detected clusters of positively selected residues between four levels of stringency at which positively selected residues are identified.

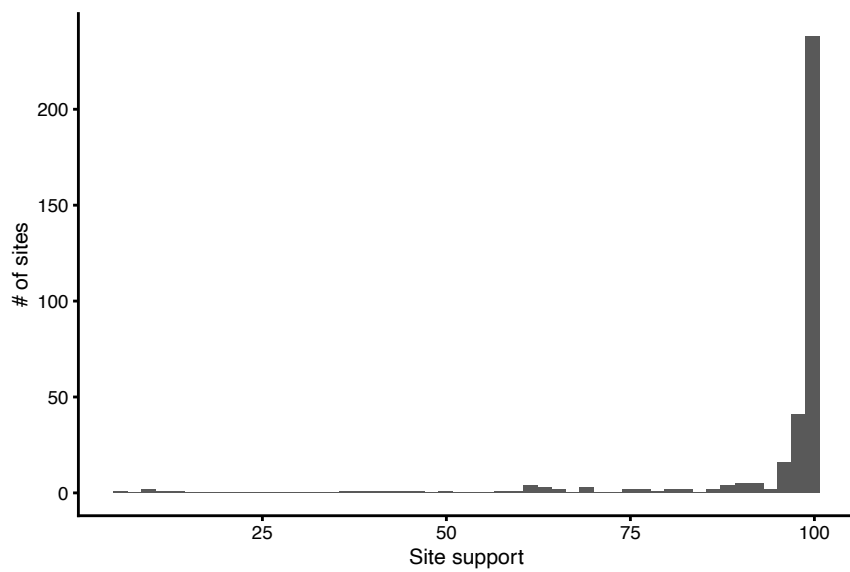

**Fig. S3.** Distribution of support values for positively selected sites upon perturbing the underlying tree topology. Most sites (84.7%) have support values of above 0.95, with the mean support of 0.944.

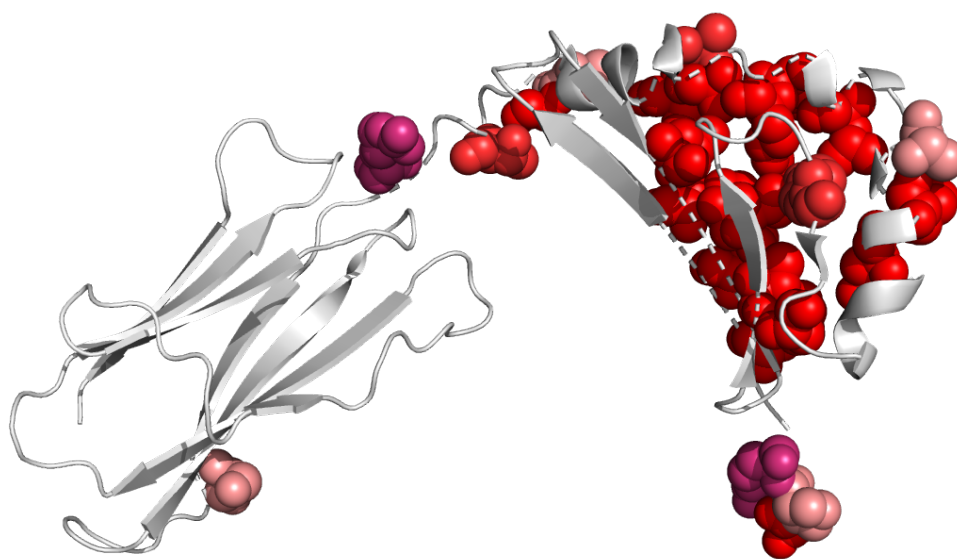

**Fig. S4.** Positively selected sites in major histocompatibility complex class II (PDB: 1aqd).

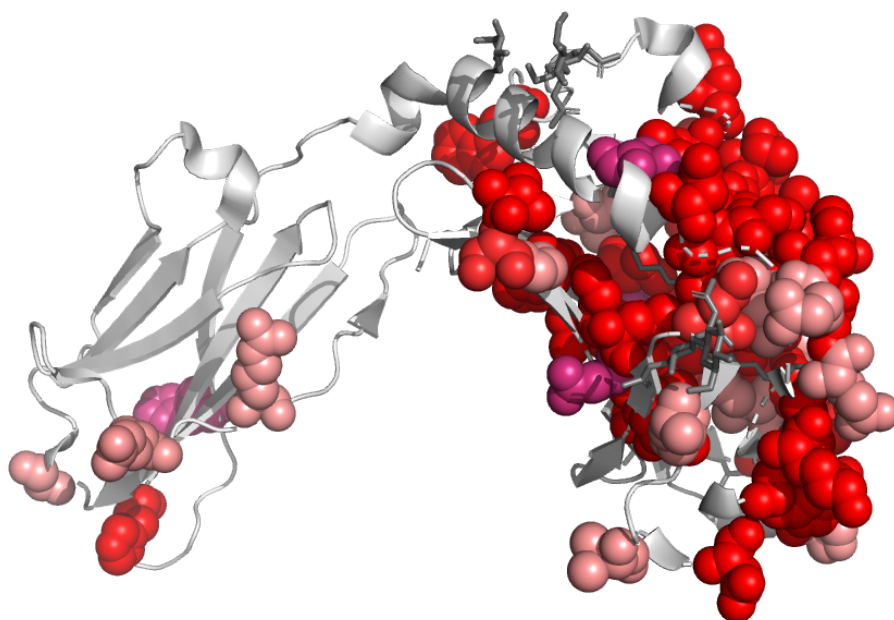

**Fig. S5.** Positively selected sites in CD1a molecule (PDB: 1onq).

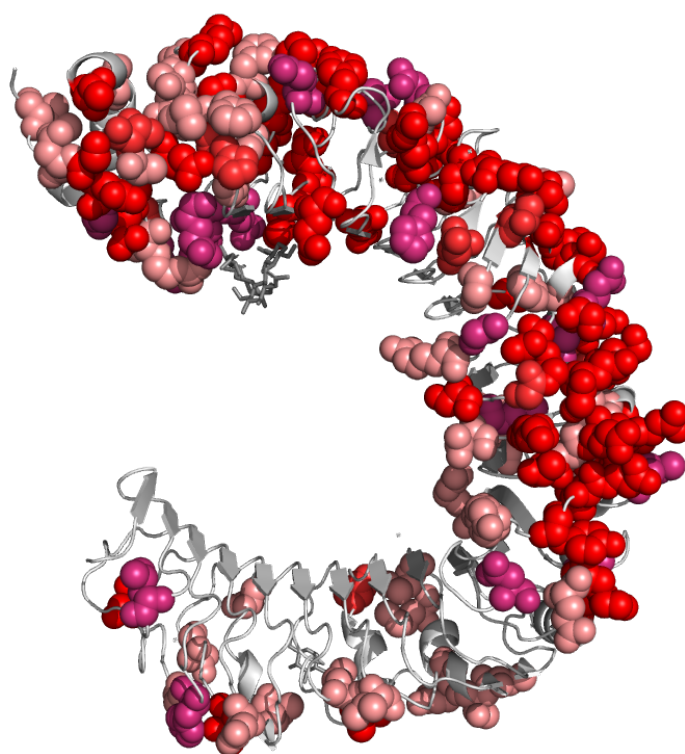

**Fig. S6.** Positively selected sites in toll-like receptor 4 (PDB: 4g8a).

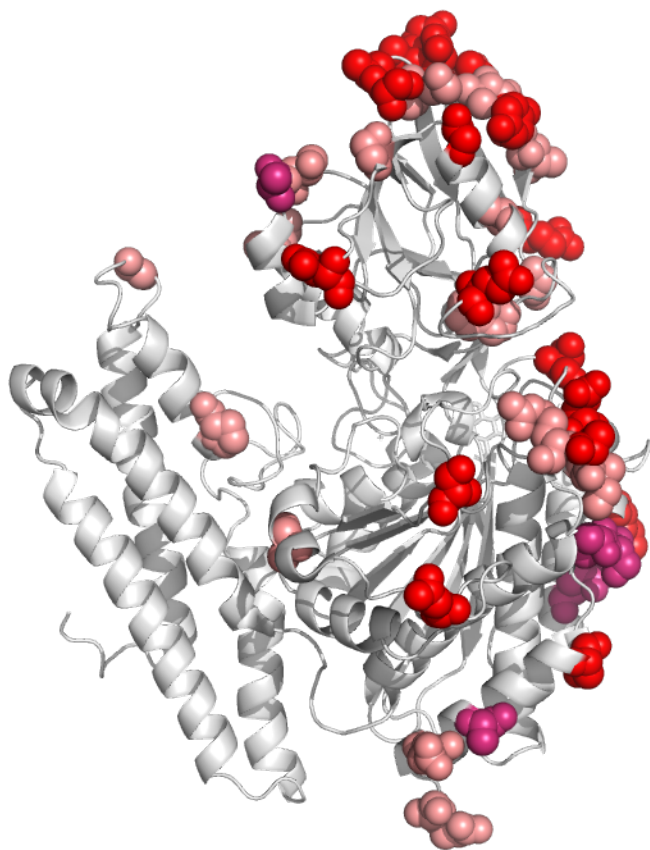

**Fig. S7.** Positively selected sites in transferrin receptor 1 (PDB: 3s9l).



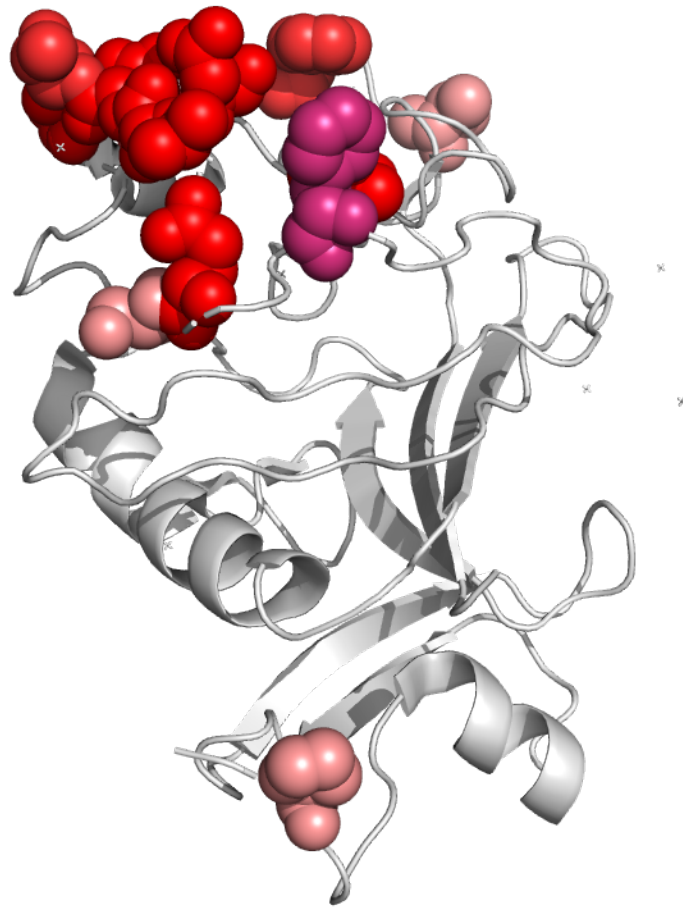

**Fig. S8.** Positively selected sites in ficolin 2 (PDB: 2j3f).

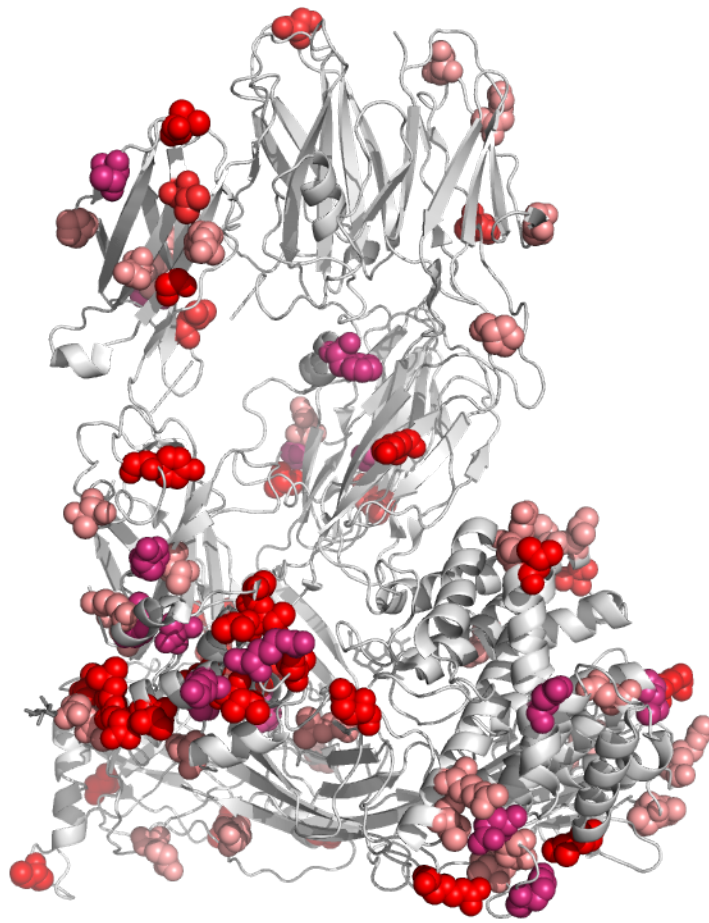

**Fig. S9.** Positively selected sites in complement component C5 (PDB: 3cu7).

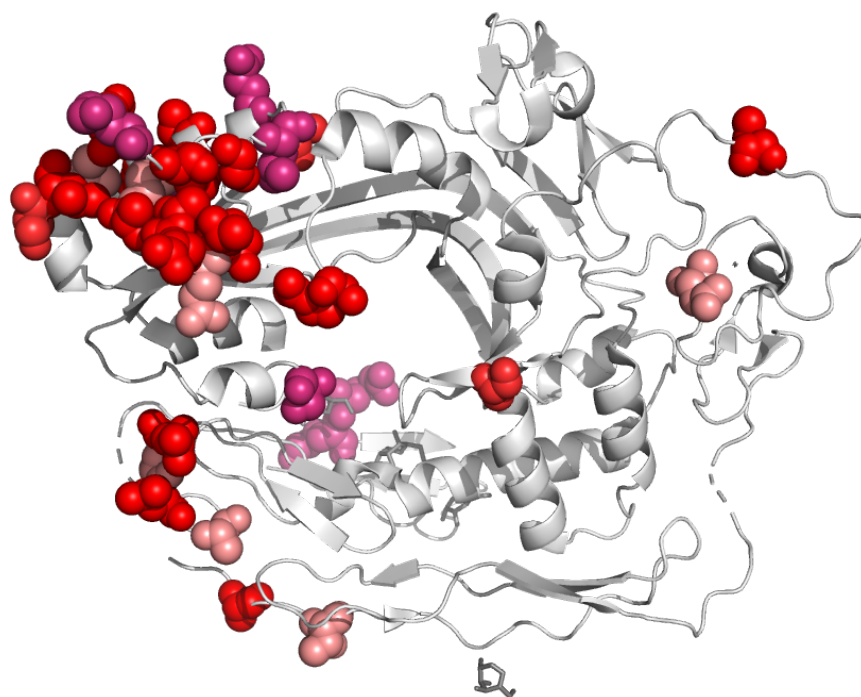

**Fig. S10.** Positively selected sites in complement component C8 (PDB: 3ojy).

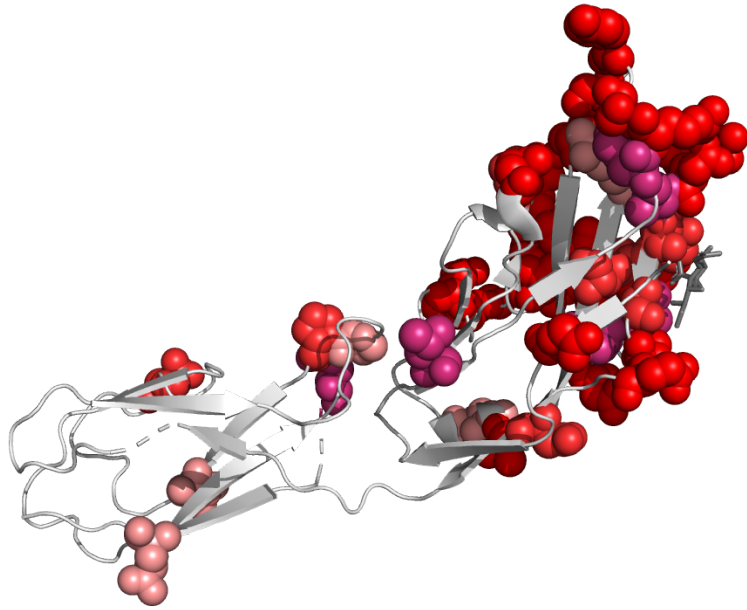

**Fig. S11.** Positively selected sites in siglec-5 (PDB: 2zg1).

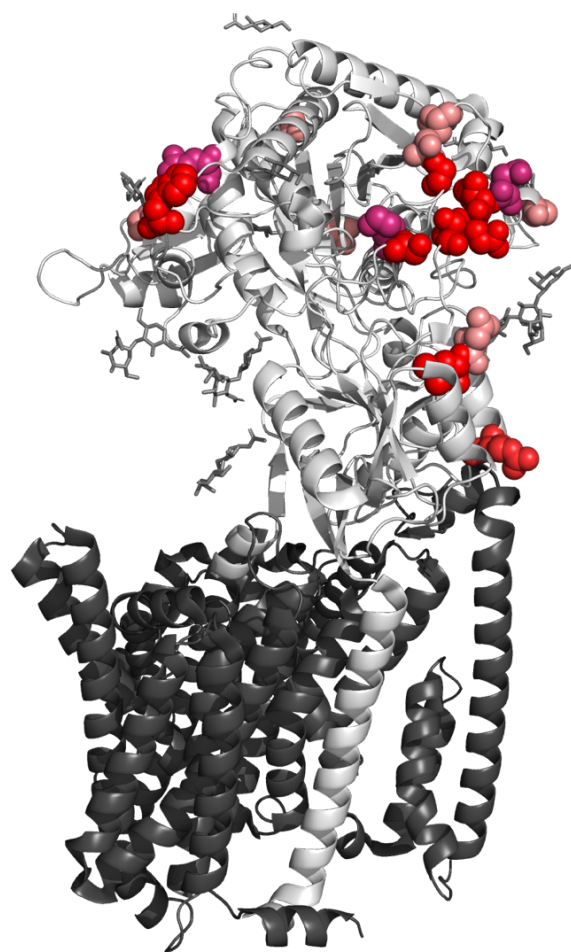

**Fig. S12.** Positively selected sites in nicastrin (PDB: 5a63).

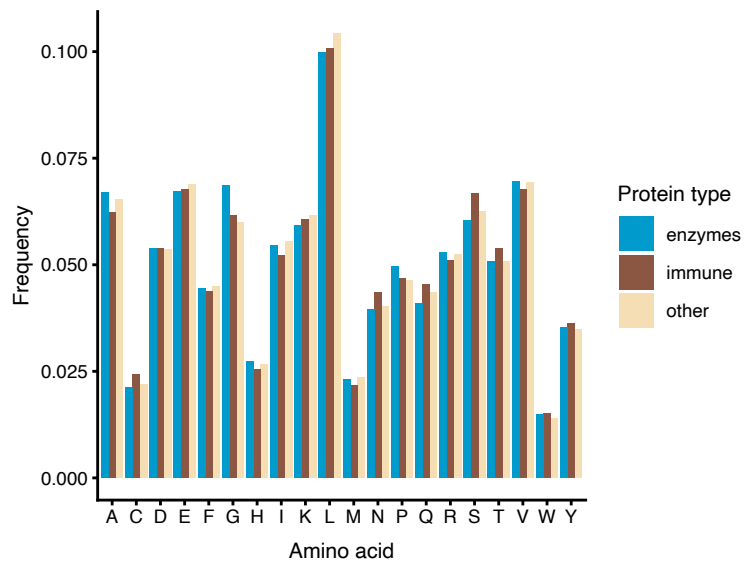

**Fig. S13.** Amino acid frequencies in enzymes, immune-related proteins and remaining proteins.

| Property                          | Pearson's r | P-value | Adj. p-value |
|-----------------------------------|-------------|---------|--------------|
| Size (Dawson, 1972)               | 0.211       | 0.373   | 0.932        |
| Hydrophobicity (Levitt, 1976)     | 0.067       | 0.780   | 0.941        |
| Net charge (Klein et al., 1984)   | 0.460       | 0.042   | 0.207        |
| Polarity (Zimmerman et al., 1968) | -0.018      | 0.942   | 0.941        |

**Table S1.** Correlations between amino-acid physicochemical properties and frequency changes at positively selected residues.
